# Supplementary material for: A novel gene family in Arabidopsis encoding putative heptahelical transmembrane proteins homologous to human adiponectin receptors and progestin receptors
Source: Oxford University Press journal article supplement (doi:10.1093/jxb/eri311), 2005-11-01
Supplement: eri311_Supplementary_Data.zip [file eri311_Supplementary_Data.zip]

Archive with 1 entries (1 files):
- eri311Supplementary_Fig._S1.pdf
