# Supplementary material for: A novel gene family in Arabidopsis encoding putative heptahelical transmembrane proteins homologous to human adiponectin receptors and progestin receptors
Source: Oxford University Press journal article supplement (doi:10.1093/jxb/eri311), 2005-11-01
Supplement: eri311_Supplementary_Data.zip [file eri311_Supplementary_Data.zip › eri311Supplementary_Fig._S1.pdf]

AtHHP1 1 .....MDQNG.....HNDEAETVSCGNGNCKSKI VPGDDHGGDESSGTRKKRKRKTQQKTMK  
AtHHP2 1 .....MQKRR.....TKIR..NGKGM...SGEKKRSEKR.....  
AtHHP3 1 .....MKRRR.....SAKKS PAM.....VTVT..DWKGLD..CGEETRIVRR.....  
AtHHP4 1 .....MGDEA.....BIKEHLKP.....QASSETMDKKHNK...GKRLWQKVK.....  
AtHHP5 1 .....MGDEA.....BIKEHLKP.....QASSETIDKKHNK...GKRLWQKVK.....  
ScYOL002c 1 .....MLHVG.....BESFQMS TLLERTKSVQELKKRAAGKTSANPAEVAKAKKVL.....  
HsAdipoR1 17 ASNREADTVELA.ELGPLLEEKGRVIANPPKAE E QTCVPVQEEEEEVRLTLPQAHAMEKMEEFVYKWEGR.....  
HsAdipoR2 29 GTRRGDND SHQG.DLEP ILEASVLSHHKKSSEHEYSDEAPQDEG.FMGMSPLQAHAMEKMEEFVCKVWEGR.....  
DmCG5315 1 .....MTEVLKAG.....VLS.....DEIDLG.....ALAHNAEQAE...FVRKWEAS.....  
CcC43G2.1 83 RATSFAGRI RAGSDDEAMPKHTILYRRKKGGQWR EINLQGT PDKRK.DDEDELEV DVKEDRSEQTGI VTKTYEAR.....  
HsMPRG 1 .....MLSLKLP.....  
HsMPRA 1 .....MAMAQK.....LSHLLPSL.....RQVIQEPQLSLQ.....PEPVFT.....  
HsMPRB 1 .....MTTAILER.....LSTLSVSG.....QQLRRLPKILEDG.....LPKMPCT.....

TM1

AtHHP1 53 RRE TMSYCELP EYMKDNEYILNYRADWS.IRDAF SVSFHNESLN VVWTHLIGFIFFVALTVAN.....  
AtHHP2 30 ...LMKFEE LPRYLK DNEFIHNNYRC EWS.IKETFLSAFSWHNETLNIWTHLCGFIFWMMVVSSET.TELGLAGFVSL  
AtHHP3 33 ...LMKFEDLP EYLK DNEFIHNNYRCQWS.LKETFLSAFSWHNETLNIWTHLIGGFIFWMTTVSCL ET.TEISLAGVFNGM  
AtHHP4 36 .YQIVFEFHS LPAYL R DNEYIIGHYRSEWP.IKQILLSTFTIHNETLN VVWTHLIGFIFLALTITYTATKVP SVVDLSLQHRL  
AtHHP5 36 .YQIVFEFHS LPAYL R DNEYIIGHYRSEWP.IKQILLSTFTIHNETLN VVWTHLIGFIFLALTITYTATKVP SVVDLSLQHRL  
ScYOL002c 46 .RRVYSWDEIPEWQRDNDFFLHG YVKETSSFIETFKSLFYHNESVNIYSHLIPALGFTVLLDKSTIKVFA.....  
HsAdipoR1 91 .WRVIPYDVL PDLK DNDFFLHGHRPPMP SFRA CFKSFRIHTETGNIWTHLLGCVLFFLGLLTM LRPNMXF.....  
HsAdipoR2 102 .WRVIPHDVLPDLK DNDFFLHGHRPPMP SFRA CFKSFRIHTETGNIWTHLLGCVLFFLGLLTM LRPNMXF.....  
DmCG5315 38 .WKVCHYK NLPKWLQDNDFFLRHGRPPPLSFRACFKSFRIHTETGNIWTHLLGCIAPFGVALYFISRPSV.....  
CcC43G2.1 157 .WKVLKYEHLPEWLODNEFLRHGRPPPLSFRACFKS IWSLHTETGNIWTHLLGCVAPFFLACWFLTRPDN.....  
HsMPRG 7 .....RPFSDIQIPQVFHEQGT LFG.YRH PQSSATACILSIFQMTNETLNIWTHLLPWFPAWRFTALYMTDIK.....  
HsMPRA 32 ...VDRAEVPPLFWKP.YIYAGYRPLHQTWRFPRTIFQOHN EAVNVWTHLLAALVLLRLALFVETVDF.....  
HsMPRB 36 ...VPETDVPQLFREP.YIRTG YRPTGHEWRYFFSIFQKHNEVNVWTHLLAALAVLRFWAF AEAEALP.....

AtHHP1 116 .....IIHHDG.....FFPVD AKSPG.....NVTRWPEFVFLGG  
AtHHP2 108 SGATIRWPWPSMAMSKDV FSSD.....QTLHDDLNVTHTRSLNSQGDV.....NYEAI PKWPNLVFLTG  
AtHHP3 111 AGVRI.....CLSSN.....QTLHDSNVTHHISCLTSQ G.....EAI PKWPNLVYLVG  
AtHHP4 117 PDLRKTDLKHLHSEL MARLPSSPSSWHVMDLLNCLPERF SHGNYTDMCVLH SVREDLANLIAPLFRPI TRWPYAFILGG  
AtHHP5 117 PDLRKTDLKHLHSEL MSRLPSSPSSWHVMDLLNCLPERF SHGNYTDMCVLH SVREDLANLIAPLFRPI TRWPYAFILGG  
ScYOL002c 118 .....TTWLDH MVIDLFYSG  
HsAdipoR1 163 .....MAPLQEKVVFGMFFLG  
HsAdipoR2 174 .....VAPLQEKVVFGMFFLG  
DmCG5315 108 .....EIQTQEKVFGAFFIG  
CcC43G2.1 227 .....HIQFQEKVGSFFFAG  
HsMPRG 76 .....NDSXSWMLVMYCT  
HsMPRA 98 .....WGDPHALPLFIIVLA  
HsMPRB 103 .....WASTHSLPLLLFELS

TM2

TM3

TM4

AtHHP1 146 SMF CILASSIC HIFCCHSKELNVFLRLIDYAGITAMITSFPIPIYI...FQCTPRWYFIYLAGITSMGIFTITLFTPSL  
AtHHP2 169 AMGCLICSSMSHIFACHSRFRNLFWRLDYAGISLMIVCSFAPITYYA...FSCHTYWRLFYSSISILGLLAIFLLSPSL  
AtHHP3 155 AMGCLICSSSVSHLLACHSKFRNVFWRLDYAGISLMIVASFPAPITYYA...FSCHPNFRLLYSSITILGLLAITLLSPAL  
AtHHP4 199 AMFCLLASSTCHLLSCHSERVSYIMLRLLDYAGIAALIA TSFYPPVYYS...FMCDPFFCNLYGFIITILGIATVLSLLPVF  
AtHHP5 199 AIFCLLASSTCHLLSCHSERVSYIMLRLLDYAGIAALIA TSFYPPVYYS...FMCDPFFCNLYGFIITILGIATVLSLLPVF  
ScYOL002c 135 AFACILILSSSFHQLKSHSLRATLGNKLDYLGTCILITVSMVSILYYG...YFEKFSLFCFLALITVSFGIACSVLSLKDKF  
HsAdipoR1 180 AVLCLISFSLFWLFTVYCHSEKVSRTSKLDYSGIALLINGSFVPWLYYG...FYCSPQPRLIYYSIVCVLGISAIIVQWDRF  
HsAdipoR2 191 AILCLISFSLFWLFTVYCHSEGVSRLESKLDYSGIALLINGSFVPWLYYG...FYCNPQPCFIYIIVICVLGIAIIVSQWDMF  
DmCG5315 125 AIVCLIGFSFAFHTLSCHSVEMGRLESKLDYCGIALLINGSFVPWLYYG...FYCHIQPKVYIYSVSVSLGILSIVVSLWDF  
CcC43G2.1 244 AVLCLIGLSFAFHTLSCHSVNVVKIPCKLDYMGISLLINGSFPIPIYI...FYCRRREPKITVYIAMVSVLGI GAIIVVSLWDF  
HsMPRG 91 SCVYPLVSSCAHTFSSMSKNARHCYFLDYGAVNLFSGSAIAYSATFPDALMCTTFHDYI VALAVLNTLSLGS SCYSRF  
HsMPRA 114 SFTYFSALAHLLQAKSEFWHSYFFFLDYVGVA VYQPSALAHFTYAI.EPAWHAQVQAVFPMAAF LWSLCSIGSCYNKY  
HsMPRB 119 SITITCTCLLAHLLQSKSEL SHYTYFVVDYVGVS VYQYGSALAHFTYSS.DQAWYDRFWLFFLPAAAF CGWLSCAGCCYAKY

TM5

TM6

AtHHP1 225 SAPK...YRAPRALFASMG LFGIVPAAHALVNV.WGNPQRNVTLVYELLM AVFYLVCTGFVGRVPERLKPGWFD RVGHS  
AtHHP2 248 SAPR...FRSFRALFLTMCFSGVIPATHVLYLH.KDHPNVLI ALVYELAMAVLYATGAAPVTRIPERWKPGAFDIAGHS  
AtHHP3 234 STPR...FRPFRANFLAMGSSAVIPATHVLYCLY.WDHPNVFI ALGYEIA TALSFFVGATFIVSRVPERWKPGAFDMAGHS  
AtHHP4 278 QSPE...FRVVRASLFFGMGFSGLAPIHKLIF.WDQPEALHTTG YEILMGLLYGLGALVYATRIPERWMPGKFDIAGHS  
AtHHP5 278 QSLE...FRVVRASLFFGMGFSGLAPIHKLIF.WDQPEALHMTGYEILMGLLYGLGAVVYATRIPERWMPGKFDIAGHS  
ScYOL002c 214 RKRE...WRPYRAGLFCVCGLISSIIPISGLYCSFSFIWTQIQLFWVLLGGVLYIIGAVLYGMRPPEKICPGKFDIAGHS  
HsAdipoR1 259 ATPK...HRQTRAGVFLGLCLSGVVP TMTHTAEGFVKATTVGQMGWFFLMAVMYITGAGLYAARIPERFPFGKFDIWFQS  
HsAdipoR2 270 ATPQ...YRGVRAGVFLGLCLSGIIP TLHYVISEGFKAATIGQIGWLLMASLYITGAALYARIPERFPFGKCDIWFQS  
DmCG5315 204 SEPA...LRPLRAGVPMSCGLSGVIPATHYYSMEGWFSQMSRASLGWLLMGLLYILGALLYALRPERWFPFGKFDIWFQS  
CcC43G2.1 323 SESR...FRPIRAAVHVGMCSCSGVPTTHYITDGVHSLFADNSFHWLLLM AFLYLLGAGLYATRIPERFPFGKCDIWFQS  
HsMPRG 173 LEIQK.PRLCKVIRVLAFAYPYTWSLPIFYRLFPGESAQNEATSYHQKHIMTLLASFLSAHLPERLAPAGRFDIYIGHS  
HsMPRA 195 IQPK...GLLGRTCQEVPSVLAYALDITSPVVRH FVSSDPTTDDPALLYHKCQVVFLLAFAFSTFM PERWFPFGSCHVFGQ  
HsMPRB 200 RYRRPYPMRKICQVVPAGLAFILDITSPVAHRVALCHLAGCQEQAAYHTQILFFLVSAFYFSCPVBEKYPFGSCD IIVGHG

TM7

AtHHP1 302 HQIFHV FVLGALSHYANALFLDWR.....DHVGC.....  
AtHHP2 325 HQIFHV FVLGALAHSVASLLIMDFRR.....ASPSCAF.....  
AtHHP3 311 HQIFHV FVMGALAHCVTTLLIIDFSR.....ASPCSGF.....  
AtHHP4 355 HQLFHVLVVGAFTHYRAGLVYLKWR.....DIEGC.....  
AtHHP5 355 HQLFHVLVVGALTHYRAGL.....  
ScYOL002c 292 HQLFHFLVVAALCHLRGLLSYELVH.....IKMENGIVS.....  
HsAdipoR1 337 HQLFHVLVVAAPVHFYGVSNLQEFR.....YGLEGGCTDDTLL.....  
HsAdipoR2 348 HQLFHIFVVGAFVHFYGVSNLQEFR.....FMIGGGCSEEDAL.....  
DmCG5315 282 HQLFHILVLAAPVHYHGISEMAMYR.....VMYSECTVPIEPITF.....  
CcC43G2.1 401 HQLFHTCVVIAAFVHYHGISEMAFAR.....LN.EQCPVR.....  
HsMPRG 254 HQLFHVCVLLATHMQMBAITLDKTLRKELLATSKPFSFQIAGAILLCIIFSLSNIIYFSAALYRIPKPELHKKET  
HsMPRA 275 HQLFHIFVLC TQAQLBAVALDYEARPIYEP LTHWPHNFGS...L.FLLTVGSSILTALFLLSQLVQRKLDQKTK  
HsMPRB 282 HQLFHAFSLSICTLSQLEAITLDYQGRQEIFLQRHGPLSVHMAC...LSFFFLAACSAATAALLRHVKARLTKKDS

**Fig. S1.** Sequence alignment of *Arabidopsis* HHPs, yeast YOL002c, human AdipoRs, human mPRs and their representative homologs from *Drosophila* and *C. elegans*. Identical and similar amino acid residues are shaded in black and gray, respectively. The locations of the seven transmembrane domains TM1 to TM7 are indicated with solid lines above the sequences. At, *Arabidopsis thaliana*; Sc, *Saccharomyces cerevisiae*; Hs, *Homo sapiens*; Dm, *Drosophila melanogaster*; Ce, *Caenorhabditis elegans*.
